# Supplementary material
Source: publisher site journal article supplement (https://www.dovepress.com/article/130834)
Supplement: Supplementary file 1 [file get_supplementary_file.php]

## Supplementary Materials

**Supplemental Table S1** Results of comparative trials of GLP-1RAs and oral glucose-lowering therapies: blood pressure and lipids

| Publication (acronym/<br>ClinicalTrials.gov<br>record)            | Study<br>design<br>[study<br>duration]                   | Treatment<br>[patient<br>number]                                                       | Background<br>therapy          | Change from baseline at study end, GLP-1RAs vs comparator  |                              |                                                            |                                                            |                                                            |                                                       |
|-------------------------------------------------------------------|----------------------------------------------------------|----------------------------------------------------------------------------------------|--------------------------------|------------------------------------------------------------|------------------------------|------------------------------------------------------------|------------------------------------------------------------|------------------------------------------------------------|-------------------------------------------------------|
|                                                                   |                                                          |                                                                                        |                                | Blood pressure<br>(mm Hg)                                  |                              | Lipid parameters (mmol/L)                                  |                                                            |                                                            |                                                       |
|                                                                   |                                                          |                                                                                        |                                | SBP                                                        | DBP                          | Total<br>cholesterol                                       | LDL<br>cholesterol                                         | HDL<br>cholesterol                                         | Triglycerides                                         |
|                                                                   |                                                          |                                                                                        |                                |                                                            |                              |                                                            |                                                            |                                                            |                                                       |
| <i>Dipeptidyl peptidase-4 inhibitors</i>                          |                                                          |                                                                                        |                                |                                                            |                              |                                                            |                                                            |                                                            |                                                       |
| Berg et al 2011 <sup>1</sup>                                      | CO, DB,<br>DD, R in<br>pts with<br>T2D [2 × 4<br>weeks]  | ExBID<br>10 mcg/SITA<br>100 mg QD<br>[41]<br>SITA<br>100 mg<br>QD/ExBID<br>10 mcg [42] | MET<br>(n = 82)<br>TZD (n = 1) | ExBID:<br>-2.5<br>SITA: -2.0                               | ExBID:<br>+1.1<br>SITA: -0.9 | NR                                                         | NR                                                         | NR                                                         | NR                                                    |
| Bergental et al 2010 <sup>2</sup><br>(DURATION-2;<br>NCT00637273) | DB, DD,<br>MC, PG, R<br>in pts with<br>T2D<br>[26 weeks] | ExQW 2 mg<br>[160]<br>SITA<br>100 mg QD<br>[166]                                       | MET                            | ExQW:<br>-3.6** <sup>a</sup><br>SITA:<br>+0.2 <sup>a</sup> | NR                           | ExQW:<br>-0.02 <sup>a</sup><br>SITA:<br>+0.08 <sup>a</sup> | ExQW:<br>-0.03 <sup>a</sup><br>SITA:<br>+0.05 <sup>a</sup> | ExQW:<br>+0.05 <sup>a</sup><br>SITA:<br>+0.05 <sup>a</sup> | No significant<br>difference<br>between<br>treatments |

| Publication (acronym/<br>ClinicalTrials.gov<br>record)                | Study<br>design<br>[study<br>duration]                                   | Treatment<br>[patient<br>number]                                                                         | Background<br>therapy | Change from baseline at study end, GLP-1RAs vs comparator |                                                       |                                                                                                         |                                                            |                                                          |                                                          |
|-----------------------------------------------------------------------|--------------------------------------------------------------------------|----------------------------------------------------------------------------------------------------------|-----------------------|-----------------------------------------------------------|-------------------------------------------------------|---------------------------------------------------------------------------------------------------------|------------------------------------------------------------|----------------------------------------------------------|----------------------------------------------------------|
|                                                                       |                                                                          |                                                                                                          |                       | Blood pressure<br>(mm Hg)                                 |                                                       | Lipid parameters (mmol/L)                                                                               |                                                            |                                                          |                                                          |
|                                                                       |                                                                          |                                                                                                          |                       | SBP                                                       | DBP                                                   | Total<br>cholesterol                                                                                    | LDL<br>cholesterol                                         | HDL<br>cholesterol                                       | Triglycerides                                            |
|                                                                       |                                                                          |                                                                                                          |                       |                                                           |                                                       |                                                                                                         |                                                            |                                                          |                                                          |
|                                                                       |                                                                          | PIO 45 mg<br>QD [165]                                                                                    |                       |                                                           |                                                       |                                                                                                         |                                                            |                                                          |                                                          |
| Russell-Jones et al 2012 <sup>3</sup><br>(DURATION-4;<br>NCT00676338) | DB, MC,<br>PG, R in<br>treatment-<br>naive pts<br>with T2D<br>[26 weeks] | ExQW 2 mg<br>[248]<br>MET<br>2000 mg/day<br>[246]<br>PIO 45 mg<br>QD [163]<br>SITA<br>100 mg QD<br>[163] | None                  | ExQW:<br>-1.3<br>SITA:<br>-1.8                            | No<br>changes<br>reported<br>for these<br>groups      | No clinically significant changes in fasting serum lipids were<br>observed during the treatment period. |                                                            |                                                          |                                                          |
| Nauck et al 2014 <sup>4</sup><br>(AWARD-5;<br>NCT00734474)            | DB, MC,<br>PG, R in<br>pts with<br>T2D [52<br>weeks]                     | DULA<br>0.75 mg QW<br>[302]<br>DULA<br>1.5 mg QW                                                         | MET                   | DULA<br>0.75: -0.5<br>DULA 1.5:<br>-0.8<br>SITA: -0.5     | DULA<br>0.75: +0.2<br>DULA 1.5:<br>+0.3<br>SITA: -0.2 | DULA 0.75:<br>-0.03<br>DULA 1.5:<br>-0.03<br>SITA: +0.10                                                | DULA 0.75:<br>+0.02<br>DULA 1.5:<br>-0.06**<br>SITA: +0.12 | DULA 0.75:<br>+0.07<br>DULA 1.5:<br>+0.05<br>SITA: +0.05 | DULA 0.75:<br>-0.15<br>DULA 1.5:<br>-0.16<br>SITA: -0.06 |

| Publication (acronym/<br>ClinicalTrials.gov<br>record)         | Study<br>design<br>[study<br>duration]                | Treatment<br>[patient<br>number]                                                                     | Background<br>therapy | Change from baseline at study end, GLP-1RAs vs comparator |                                                        |                                                            |                          |                          |                 |
|----------------------------------------------------------------|-------------------------------------------------------|------------------------------------------------------------------------------------------------------|-----------------------|-----------------------------------------------------------|--------------------------------------------------------|------------------------------------------------------------|--------------------------|--------------------------|-----------------|
|                                                                |                                                       |                                                                                                      |                       | Blood pressure<br>(mm Hg)                                 |                                                        | Lipid parameters (mmol/L)                                  |                          |                          |                 |
|                                                                |                                                       |                                                                                                      |                       | SBP                                                       | DBP                                                    | Total<br>cholesterol                                       | LDL<br>cholesterol       | HDL<br>cholesterol       | Triglycerides   |
|                                                                |                                                       |                                                                                                      |                       |                                                           |                                                        |                                                            |                          |                          |                 |
|                                                                |                                                       | [304]<br>SITA<br>100 mg QD<br>[315]<br>PBO [177]                                                     |                       |                                                           |                                                        |                                                            |                          |                          |                 |
| Weinstock et al 2015 <sup>b</sup><br>(AWARD-5;<br>NCT00734474) | DB, MC,<br>PG, R in<br>pts with<br>T2D [104<br>weeks] | DULA<br>0.75 mg QW<br>[302]<br>DULA<br>1.5 mg QW<br>[304]<br>SITA<br>100 mg QD<br>[315]<br>PBO [177] | MET                   | DULA<br>0.75: +1.3<br>DULA 1.5:<br>-0.1<br>SITA: <0.1     | DULA<br>0.75: +1.4*<br>DULA 1.5:<br>+0.4<br>SITA: -0.4 | No significant differences in fasting lipids were observed |                          |                          |                 |
| Charbonnel et al 2013 <sup>b</sup><br>(NCT01296412)            | OL, MC,<br>PG, R in                                   | LIRA<br>1.2 mg/day <sup>b</sup>                                                                      | MET                   | LIRA: -1.9<br>SITA: +0.9                                  | LIRA: +0.4<br>SITA: +0.8                               | LIRA: +0.1<br>SITA: +2.1                                   | LIRA: +3.2<br>SITA: +7.3 | LIRA: +4.6<br>SITA: +3.9 | NR<br>% change: |

| Publication (acronym/<br>ClinicalTrials.gov<br>record) | Study<br>design<br>[study<br>duration]               | Treatment<br>[patient<br>number]                                                   | Background<br>therapy | Change from baseline at study end, GLP-1RAs vs comparator  |                                                            |                                                            |                                                            |                                                            |                                                            |
|--------------------------------------------------------|------------------------------------------------------|------------------------------------------------------------------------------------|-----------------------|------------------------------------------------------------|------------------------------------------------------------|------------------------------------------------------------|------------------------------------------------------------|------------------------------------------------------------|------------------------------------------------------------|
|                                                        |                                                      |                                                                                    |                       | Blood pressure<br>(mm Hg)                                  |                                                            | Lipid parameters (mmol/L)                                  |                                                            |                                                            |                                                            |
|                                                        |                                                      |                                                                                    |                       | SBP                                                        | DBP                                                        | Total<br>cholesterol                                       | LDL<br>cholesterol                                         | HDL<br>cholesterol                                         | Triglycerides                                              |
|                                                        |                                                      |                                                                                    |                       |                                                            |                                                            |                                                            |                                                            |                                                            |                                                            |
|                                                        | pts with<br>T2D [26<br>weeks]                        | [253]<br>SITA<br>100 mg OD <sup>c</sup><br>[269]                                   |                       |                                                            |                                                            |                                                            |                                                            |                                                            | LIRA: -9.8%<br>SITA: -10.5%                                |
| Pratley et al 2010 <sup>b</sup><br>(NCT00700817)       | OL, MC,<br>PG, R in<br>pts with<br>T2D [26<br>weeks] | LIRA 1.2<br>mg/day [225]<br>LIRA 1.8<br>mg/day [221]<br>SITA<br>100 mg QD<br>[219] | MET                   | LIRA 1.2:<br>-0.55<br>LIRA 1.8:<br>-0.72<br>SITA:<br>-0.94 | LIRA 1.2:<br>-0.71<br>LIRA 1.8:<br>+0.07<br>SITA:<br>-1.78 | LIRA 1.2:<br>-0.03<br>LIRA 1.8:<br>-0.17<br>SITA:<br>-0.02 | LIRA 1.2:<br>+0.08<br>LIRA 1.8:<br>+0.05<br>SITA:<br>+0.13 | LIRA 1.2:<br>0.00<br>LIRA 1.8:<br>0.00<br>SITA:<br>0.00    | LIRA 1.2:<br>-0.19<br>LIRA 1.8:<br>-0.43<br>SITA:<br>-0.40 |
| Pratley et al 2011 <sup>c</sup><br>(NCT00700817)       | OL, MC,<br>PG, R in<br>pts with<br>T2D [52<br>weeks] | LIRA 1.2<br>mg/day [225]<br>LIRA 1.8<br>mg/day [221]<br>SITA 100<br>mg QD [219]    | MET                   | LIRA 1.2:<br>-0.37<br>LIRA 1.8:<br>-2.55<br>SITA:<br>-1.03 | LIRA 1.2:<br>-0.53<br>LIRA 1.8:<br>-0.87<br>SITA:<br>-1.47 | LIRA 1.2:<br>-0.01<br>LIRA 1.8:<br>-0.09<br>SITA:<br>+0.03 | LIRA 1.2:<br>+0.09<br>LIRA 1.8:<br>+0.09<br>SITA:<br>+0.17 | LIRA 1.2:<br>+0.01<br>LIRA 1.8:<br>+0.02<br>SITA:<br>+0.01 | LIRA 1.2:<br>-0.10<br>LIRA 1.8:<br>-0.32<br>SITA:<br>-0.23 |

| Publication (acronym/<br>ClinicalTrials.gov<br>record) | Study<br>design<br>[study<br>duration]                                                                         | Treatment<br>[patient<br>number]                                              | Background<br>therapy | Change from baseline at study end, GLP-1RAs vs comparator |                                       |                                         |                                                          |                                      |                                         |
|--------------------------------------------------------|----------------------------------------------------------------------------------------------------------------|-------------------------------------------------------------------------------|-----------------------|-----------------------------------------------------------|---------------------------------------|-----------------------------------------|----------------------------------------------------------|--------------------------------------|-----------------------------------------|
|                                                        |                                                                                                                |                                                                               |                       | Blood pressure<br>(mm Hg)                                 |                                       | Lipid parameters (mmol/L)               |                                                          |                                      |                                         |
|                                                        |                                                                                                                |                                                                               |                       | SBP                                                       | DBP                                   | Total<br>cholesterol                    | LDL<br>cholesterol                                       | HDL<br>cholesterol                   | Triglycerides                           |
|                                                        |                                                                                                                |                                                                               |                       |                                                           |                                       |                                         |                                                          |                                      |                                         |
| Pratley et al 2012 <sup>8</sup><br>(NCT00700817)       | OL<br>extension<br>of pts with<br>T2D<br>completing<br>the 1860-<br>LIRA-<br>DPP-4<br>core study<br>[26 weeks] | SITA 100mg<br>to LIRA 1.2<br>mg [67]<br>SITA 100<br>mg to LIRA<br>1.8 mg [68] | MET                   | LIRA 1.2:<br>-2.1<br>LIRA 1.8:<br>+0.4                    | LIRA 1.2:<br>-0.6<br>LIRA 1.8:<br>0.0 | LIRA 1.2:<br>-0.2<br>LIRA 1.8:<br>-0.2† | LIRA 1.2:<br>-0.2†<br>LIRA 1.8:<br>0.3††                 | LIRA 1.2:<br>0.0<br>LIRA 1.8:<br>0.0 | LIRA 1.2:<br>-0.2<br>LIRA 1.8:<br>-0.3† |
| Takeshita et al 2015 <sup>9</sup>                      | OL, PG, R<br>in<br>Japanese<br>pts with<br>T2D not<br>adequately                                               | LIRA 0.9 mg<br>QD [54]<br>VILD 50 mg<br>BID [58]                              | None                  | LIRA:<br>-2.5<br>VILD:<br>-7.9                            | NR                                    | LIRA:<br>-0.29††<br>VILD:<br>-0.03      | LIRA:<br>0.0 <sup>d</sup><br>VILD:<br>-0.01 <sup>d</sup> | LIRA:<br>-0.09<br>VILD:<br>+0.02     | LIRA:<br>-0.12<br>VILD:<br>-0.15        |

| Publication (acronym/<br>ClinicalTrials.gov<br>record)          | Study<br>design<br>[study<br>duration]                                 | Treatment<br>[patient<br>number]                                                       | Background<br>therapy | Change from baseline at study end, GLP-1RAs vs comparator                                           |                                                                                                       |                           |                    |                    |               |
|-----------------------------------------------------------------|------------------------------------------------------------------------|----------------------------------------------------------------------------------------|-----------------------|-----------------------------------------------------------------------------------------------------|-------------------------------------------------------------------------------------------------------|---------------------------|--------------------|--------------------|---------------|
|                                                                 |                                                                        |                                                                                        |                       | Blood pressure<br>(mm Hg)                                                                           |                                                                                                       | Lipid parameters (mmol/L) |                    |                    |               |
|                                                                 |                                                                        |                                                                                        |                       | SBP                                                                                                 | DBP                                                                                                   | Total<br>cholesterol      | LDL<br>cholesterol | HDL<br>cholesterol | Triglycerides |
|                                                                 |                                                                        |                                                                                        |                       |                                                                                                     |                                                                                                       |                           |                    |                    |               |
|                                                                 | controlled<br>by SITA-<br>based<br>therapy<br>[12 weeks]               |                                                                                        |                       |                                                                                                     |                                                                                                       |                           |                    |                    |               |
| <b>Metformin</b>                                                |                                                                        |                                                                                        |                       |                                                                                                     |                                                                                                       |                           |                    |                    |               |
| Umpierrez et al 2014 <sup>10</sup><br>(AWARD-3;<br>NCT01126580) | DB, DD,<br>MC, PG, R<br>in pts with<br>T2D [52<br>weeks <sup>a</sup> ] | DULA 0.75<br>mg QW<br>[270]<br>DULA 1.5<br>mg QW<br>[269]<br>MET ≥1500<br>mg/day [268] | None                  | At 26<br>weeks<br>DULA<br>0.75: -2.6<br>DULA 1.5:<br>-1.9<br>MET:<br>-0.9<br>At 52<br>weeks<br>DULA | At 26<br>weeks<br>DULA<br>0.75: -1.0<br>DULA 1.5:<br>+0.05<br>MET:<br>-0.64<br>At 52<br>weeks<br>DULA | NR                        | NR                 | NR                 | NR            |

| Publication (acronym/<br>ClinicalTrials.gov<br>record)        | Study<br>design<br>[study<br>duration]                                                        | Treatment<br>[patient<br>number]                                          | Background<br>therapy | Change from baseline at study end, GLP-1RAs vs comparator |                   |                           |                    |                    |               |
|---------------------------------------------------------------|-----------------------------------------------------------------------------------------------|---------------------------------------------------------------------------|-----------------------|-----------------------------------------------------------|-------------------|---------------------------|--------------------|--------------------|---------------|
|                                                               |                                                                                               |                                                                           |                       | Blood pressure<br>(mm Hg)                                 |                   | Lipid parameters (mmol/L) |                    |                    |               |
|                                                               |                                                                                               |                                                                           |                       | SBP                                                       | DBP               | Total<br>cholesterol      | LDL<br>cholesterol | HDL<br>cholesterol | Triglycerides |
|                                                               |                                                                                               |                                                                           |                       |                                                           |                   |                           |                    |                    |               |
|                                                               |                                                                                               |                                                                           |                       | 0.75: -2.7                                                | 0.75: -1.4        |                           |                    |                    |               |
|                                                               |                                                                                               |                                                                           |                       | DULA 1.5:<br>-0.1                                         | DULA 1.5:<br>+0.3 |                           |                    |                    |               |
|                                                               |                                                                                               |                                                                           |                       | MET: -1.0                                                 | MET: -0.4         |                           |                    |                    |               |
| <b>Sulfonylureas</b>                                          |                                                                                               |                                                                           |                       |                                                           |                   |                           |                    |                    |               |
| Gallwitz et al 2012 <sup>11</sup><br>(EUREXA;<br>NCT00359762) | OL, R, MC<br>in<br>overweight<br>pts with<br>T2D poorly<br>controlled<br>on MET<br>[~3 years] | ExBID 10<br>mcg <sup>f</sup> [490]<br>GLIM 1 mg<br>TID <sup>g</sup> [487] | MET                   | ExBID:<br>-1.9***<br>GLIM:<br>+1.1                        | NR                | NR                        | NR                 | NR                 | NR            |
| Nauck et al 2009 <sup>12</sup> (LEAD-<br>2; NCT00318461)      | DB, DD,<br>MC, PG, R<br>in pts with                                                           | LIRA 0.6 mg<br>QD [242]<br>LIRA 1.2 mg                                    | MET                   | LIRA 0.6:<br>-0.6<br>LIRA 1.2:                            | No<br>changes     | NR                        | NR                 | NR                 | NR            |

| Publication (acronym/<br>ClinicalTrials.gov<br>record)   | Study<br>design<br>[study<br>duration]                                                             | Treatment<br>[patient<br>number]                                                                                   | Background<br>therapy | Change from baseline at study end, GLP-1RAs vs comparator                      |                                                                               |                                                                                    |                                                                                    |                                                                                   |                                                                                    |  |
|----------------------------------------------------------|----------------------------------------------------------------------------------------------------|--------------------------------------------------------------------------------------------------------------------|-----------------------|--------------------------------------------------------------------------------|-------------------------------------------------------------------------------|------------------------------------------------------------------------------------|------------------------------------------------------------------------------------|-----------------------------------------------------------------------------------|------------------------------------------------------------------------------------|--|
|                                                          |                                                                                                    |                                                                                                                    |                       | Blood pressure<br>(mm Hg)                                                      |                                                                               | Lipid parameters (mmol/L)                                                          |                                                                                    |                                                                                   |                                                                                    |  |
|                                                          |                                                                                                    |                                                                                                                    |                       | SBP                                                                            | DBP                                                                           | Total<br>cholesterol                                                               | LDL<br>cholesterol                                                                 | HDL<br>cholesterol                                                                | Triglycerides                                                                      |  |
|                                                          |                                                                                                    |                                                                                                                    |                       |                                                                                |                                                                               |                                                                                    |                                                                                    |                                                                                   |                                                                                    |  |
|                                                          | T2D [26<br>weeks]                                                                                  | QD [240]<br>LIRA 1.8 mg<br>QD [242]<br>GLIM 4 mg<br>QD [242]<br>PBO [121]                                          |                       | -2.8*                                                                          | LIRA 1.8:<br>-2.3*                                                            | GLIM 4:<br>+0.4                                                                    |                                                                                    |                                                                                   |                                                                                    |  |
| Nauck et al 2013 <sup>13</sup> (LEAD-<br>2; NCT00318461) | OL<br>extension<br>of pts with<br>T2D<br>completing<br>the LEAD-<br>2 core<br>study [18<br>months] | LIRA 0.6 mg<br>QD [184]<br>LIRA 1.2 mg<br>QD [178]<br>LIRA 1.8 mg<br>QD [174]<br>GLIM 4 mg<br>QD [183]<br>PBO [61] | MET                   | LIRA 0.6:<br>+0.2<br>LIRA 1.2:<br>-2.5<br>LIRA 1.8:<br>-2.0<br>GLIM 4:<br>+0.3 | LIRA 0.6:<br>+0.4<br>LIRA 1.2:<br>-0.8<br>LIRA 1.8:<br>-0.5<br>GLIM 4:<br>0.0 | LIRA 0.6:<br>-0.01<br>LIRA 1.2:<br>+0.09<br>LIRA 1.8:<br>+0.07<br>GLIM 4:<br>+0.08 | LIRA 0.6:<br>-0.23<br>LIRA 1.2:<br>-0.17<br>LIRA 1.8:<br>-0.13<br>GLIM 4:<br>-0.12 | LIRA 0.6:<br>0.00<br>LIRA 1.2:<br>-0.03<br>LIRA 1.8:<br>-0.02<br>GLIM 4:<br>-0.05 | LIRA 0.6:<br>-0.18<br>LIRA 1.2:<br>-0.13<br>LIRA 1.8:<br>-0.11<br>GLIM 4:<br>+0.06 |  |
| Garber et al 2009 <sup>14</sup><br>(LEAD-3 Mono;         | DB, DD,<br>MC, PG, R                                                                               | LIRA 1.2 mg<br>QD [251]                                                                                            | None                  | LIRA 1.2:<br>-2.1                                                              | Slight but<br>NS                                                              | NR                                                                                 | NR                                                                                 | NR                                                                                | NR                                                                                 |  |



| Publication (acronym/<br>ClinicalTrials.gov<br>record)           | Study<br>design<br>[study<br>duration]                                                            | Treatment<br>[patient<br>number]                                           | Background<br>therapy | Change from baseline at study end, GLP-1RAs vs comparator                         |                                                            |                              |                               |                               |                              |
|------------------------------------------------------------------|---------------------------------------------------------------------------------------------------|----------------------------------------------------------------------------|-----------------------|-----------------------------------------------------------------------------------|------------------------------------------------------------|------------------------------|-------------------------------|-------------------------------|------------------------------|
|                                                                  |                                                                                                   |                                                                            |                       | Blood pressure<br>(mm Hg)                                                         |                                                            | Lipid parameters (mmol/L)    |                               |                               |                              |
|                                                                  |                                                                                                   |                                                                            |                       | SBP                                                                               | DBP                                                        | Total<br>cholesterol         | LDL<br>cholesterol            | HDL<br>cholesterol            | Triglycerides                |
|                                                                  |                                                                                                   |                                                                            |                       |                                                                                   |                                                            |                              |                               |                               |                              |
| NCT00294723)                                                     | in pts with<br>early T2D<br>[52 weeks]                                                            | LIRA 1.8 mg<br>QD [247]<br>GLIM 8 mg<br>QD [248]                           |                       | LIRA 1.8:<br>-3.6†<br>GLIM: -0.7                                                  | decrease<br>in all<br>groups                               |                              |                               |                               |                              |
| Garber et al 2011 <sup>15</sup><br>(LEAD-3 Mono;<br>NCT00294723) | OL<br>extension<br>of pts with<br>T2D<br>completing<br>the LEAD-<br>3 core<br>study [52<br>weeks] | LIRA 1.2 mg<br>QD [110]<br>LIRA 1.8 mg<br>QD [114]<br>GLIM 8 mg<br>QD [97] | None                  | LIRA 1.2:<br>-1.35<br>LIRA 1.8:<br>-2.37<br>GLIM:<br>-0.49                        | LIRA 1.2:<br>-0.58<br>LIRA 1.8:<br>-0.81<br>GLIM:<br>-0.44 | NR                           | NR                            | NR                            | NR                           |
| Seino et al 2010 <sup>16</sup><br>(NCT00393718)                  | DB, DD,<br>MC, PG, R<br>in<br>Japanese                                                            | LIRA 0.9 mg<br>QD [272]<br>GLYB 1.25-<br>2.5 mg/day                        | None                  | No significant difference<br>between treatment<br>groups (values not<br>reported) |                                                            | LIRA: -0.31<br>GLYB:<br>-0.2 | LIRA: -0.19<br>GLYB:<br>-0.12 | LIRA: -0.03<br>GLYB:<br>-0.01 | LIRA: +0.05<br>GLYB:<br>+0.1 |

| Publication (acronym/<br>ClinicalTrials.gov<br>record) | Study<br>design<br>[study<br>duration]                                               | Treatment<br>[patient<br>number]                                                 | Background<br>therapy | Change from baseline at study end, GLP-1RAs vs comparator |     |                                      |                                     |                                   |                                   |
|--------------------------------------------------------|--------------------------------------------------------------------------------------|----------------------------------------------------------------------------------|-----------------------|-----------------------------------------------------------|-----|--------------------------------------|-------------------------------------|-----------------------------------|-----------------------------------|
|                                                        |                                                                                      |                                                                                  |                       | Blood pressure<br>(mm Hg)                                 |     | Lipid parameters (mmol/L)            |                                     |                                   |                                   |
|                                                        |                                                                                      |                                                                                  |                       | SBP                                                       | DBP | Total<br>cholesterol                 | LDL<br>cholesterol                  | HDL<br>cholesterol                | Triglycerides                     |
|                                                        |                                                                                      |                                                                                  |                       |                                                           |     |                                      |                                     |                                   |                                   |
|                                                        | pts with<br>T2D [24<br>weeks]                                                        | [139]                                                                            |                       |                                                           |     |                                      |                                     |                                   |                                   |
| Kaku et al 2011 <sup>17</sup><br>(NCT00393718)         | OL<br>extension<br>of Seino<br>study in<br>Japanese<br>pts with<br>T2D [52<br>weeks] | LIRA 0.9 mg<br>QD [268]<br>GLYB 1.25–<br>2.5 mg/day<br>[132]                     | None                  | NR                                                        | NR  | Treatment<br>difference:<br>–0.10    | Treatment<br>difference:<br>–0.05   | Treatment<br>difference:<br>+0.03 | Treatment<br>difference:<br>–0.17 |
| <b>Thiazolidinediones</b>                              |                                                                                      |                                                                                  |                       |                                                           |     |                                      |                                     |                                   |                                   |
| DeFronzo et al 2010 <sup>18</sup><br>(NCT00135330)     | OL, MC,<br>PG, R in<br>MET-<br>treated pts<br>with T2D                               | ExBID<br>10 mcg <sup>f</sup> [45]<br>ROSI 4 mg<br>BID <sup>f</sup> [45]<br>ExBID | MET                   | NR                                                        | NR  | ExBID:<br>–0.13***<br>ROSI:<br>+0.44 | ExBID:<br>–0.05**<br>ROSI:<br>+0.33 | ExBID:<br>+0.02<br>ROSI:<br>+0.06 | ExBID:<br>–0.34<br>ROSI:<br>+0.07 |

| Publication (acronym/<br>ClinicalTrials.gov<br>record)            | Study<br>design<br>[study<br>duration]                                                         | Treatment<br>[patient<br>number]                                                                                 | Background<br>therapy | Change from baseline at study end, GLP-1RAs vs comparator |                                |                                                        |                                                        |                                                            |                                                           |
|-------------------------------------------------------------------|------------------------------------------------------------------------------------------------|------------------------------------------------------------------------------------------------------------------|-----------------------|-----------------------------------------------------------|--------------------------------|--------------------------------------------------------|--------------------------------------------------------|------------------------------------------------------------|-----------------------------------------------------------|
|                                                                   |                                                                                                |                                                                                                                  |                       | Blood pressure<br>(mm Hg)                                 |                                | Lipid parameters (mmol/L)                              |                                                        |                                                            |                                                           |
|                                                                   |                                                                                                |                                                                                                                  |                       | SBP                                                       | DBP                            | Total<br>cholesterol                                   | LDL<br>cholesterol                                     | HDL<br>cholesterol                                         | Triglycerides                                             |
|                                                                   |                                                                                                |                                                                                                                  |                       |                                                           |                                |                                                        |                                                        |                                                            |                                                           |
|                                                                   | [20 weeks]                                                                                     | 10 mcg +<br>ROSI 4 mg<br>BID <sup>f</sup> [47]                                                                   |                       |                                                           |                                |                                                        |                                                        |                                                            |                                                           |
| Xu et al 2015 <sup>19</sup><br>(CONFIDENCE;<br>NCT01147627)       | OL, MC,<br>PG, R in<br>treatment-<br>naive pts<br>with newly<br>diagnosed<br>T2D [48<br>weeks] | ExBID<br>10 mcg <sup>f</sup><br>[142]<br>PIO 30–45<br>mg QD [136]<br>ILis 0.2<br>IU/kg<br>BID <sup>f</sup> [138] | None                  | ExBID:<br>-4†<br>PIO:<br>-1                               | ExBID:<br>-3†<br>PIO:<br>-3††† | ExBID:<br>-0.2†*<br>PIO:<br>-0.1                       | ExBID:<br>-0.2†<br>PIO:<br>-0.1                        | ExBID:<br>+0.08†**<br>PIO:<br>+0.16†††                     | ExBID:<br>-0.2†<br>PIO:<br>-0.2                           |
| Bergental et al 2010 <sup>2</sup><br>(DURATION-2;<br>NCT00637273) | DB, DD,<br>MC, PG, R<br>in pts with<br>T2D [26<br>weeks]                                       | ExQW 2 mg<br>[160]<br>SITA 100<br>mg QD [166]<br>PIO 45 mg<br>QD [165]                                           | MET                   | ExQW:<br>-3.6** <sup>a</sup><br>PIO: -1.6 <sup>a</sup>    | NR                             | ExQW:<br>-0.02 <sup>a</sup><br>PIO: +0.16 <sup>a</sup> | ExQW:<br>-0.03 <sup>a</sup><br>PIO: +0.05 <sup>a</sup> | ExQW:<br>+0.05**** <sup>a</sup><br>PIO: +0.16 <sup>a</sup> | ExQW:<br>-0.04**** <sup>a</sup><br>PIO: -0.1 <sup>a</sup> |

| Publication (acronym/<br>ClinicalTrials.gov<br>record)                | Study<br>design<br>[study<br>duration]                                                                   | Treatment<br>[patient<br>number]                                                                                        | Background<br>therapy | Change from baseline at study end, GLP-1RAs vs comparator                              |                                                                                        |                                                                                                         |                    |                    |               |
|-----------------------------------------------------------------------|----------------------------------------------------------------------------------------------------------|-------------------------------------------------------------------------------------------------------------------------|-----------------------|----------------------------------------------------------------------------------------|----------------------------------------------------------------------------------------|---------------------------------------------------------------------------------------------------------|--------------------|--------------------|---------------|
|                                                                       |                                                                                                          |                                                                                                                         |                       | Blood pressure<br>(mm Hg)                                                              |                                                                                        | Lipid parameters (mmol/L)                                                                               |                    |                    |               |
|                                                                       |                                                                                                          |                                                                                                                         |                       | SBP                                                                                    | DBP                                                                                    | Total<br>cholesterol                                                                                    | LDL<br>cholesterol | HDL<br>cholesterol | Triglycerides |
| Russell-Jones et al 2012 <sup>3</sup><br>(DURATION-4;<br>NCT00676338) | DB, MC,<br>PG, R in<br>treatment-<br>naive pts<br>with T2D<br>[26 weeks]                                 | ExQW 2 mg<br>[248]<br>MET 2000<br>mg/day [246]<br>PIO 45 mg<br>QD [163]<br>SITA 100<br>mg QD [163]                      | None                  | ExQW:<br>-1.3<br>PIO: -1.7                                                             | ExQW:<br>NR<br>PIO: -2.5                                                               | No clinically significant changes in fasting serum lipids were<br>observed during the treatment period. |                    |                    |               |
| Marre et al 2009 <sup>20</sup> (LEAD-<br>1 SU; NCT00318422)           | DB, DD,<br>MC, PG, R<br>in pts with<br>T2D<br>treated<br>with oral<br>GLT for ≥3<br>months<br>[26 weeks] | LIRA 0.6<br>mg/day [233]<br>LIRA 1.2<br>mg/day [228]<br>LIRA 1.8<br>mg/day [234]<br>ROSI 4<br>mg/day [232]<br>PBO [114] | GLIM                  | No<br>significant<br>differences<br>between<br>treatments<br>(decreases<br>of 0.9–2.8) | No<br>significant<br>differences<br>between<br>treatments<br>(decreases<br>of 0.7–1.4) | NR                                                                                                      | NR                 | NR                 | NR            |

| Publication (acronym/<br>ClinicalTrials.gov<br>record) | Study<br>design<br>[study<br>duration] | Treatment<br>[patient<br>number] | Background<br>therapy | Change from baseline at study end, GLP-1RAs vs comparator |     |                           |                    |                    |               |
|--------------------------------------------------------|----------------------------------------|----------------------------------|-----------------------|-----------------------------------------------------------|-----|---------------------------|--------------------|--------------------|---------------|
|                                                        |                                        |                                  |                       | Blood pressure<br>(mm Hg)                                 |     | Lipid parameters (mmol/L) |                    |                    |               |
|                                                        |                                        |                                  |                       | SBP                                                       | DBP | Total<br>cholesterol      | LDL<br>cholesterol | HDL<br>cholesterol | Triglycerides |

**Notes:** <sup>a</sup> Values estimated from a figure; <sup>b</sup> After 12 weeks, LIRA up-titrated to 1.8 mg/day in pts with A1C  $\geq$ 7.0% (53 mmol/mol) and FG >6.05 mmol/L; <sup>c</sup> After 12 weeks, GLIM 1 or 2 mg/day added to regimen of pts with A1C  $\geq$ 7.0% (53 mmol/mol) and FG >6.05 mmol/L; <sup>d</sup> Data for small dense LDL; <sup>e</sup> Primary end point was the change from baseline in A1C at 26 weeks. Secondary end points included the change from baseline in A1C at 52 weeks, and the change from baseline in FG and BW at 26 and 52 weeks; <sup>f</sup> Administered at half the named dosage for the first month of the study; <sup>g</sup> Dosage adjusted every 4 weeks up to the maximum tolerated dosage according to country-specific labeling information. \* $P < 0.05$ ; \*\* $P < 0.01$ ; \*\*\* $P \leq 0.001$ , GLP-1RA vs comparator; † $P < 0.05$ , †† $P < 0.01$ , †††  $P \leq 0.001$  vs baseline (start of extension).

**Abbreviations:** AWARD, Assessment of Weekly Administration of Dulaglutide in Diabetes; BID, twice daily; CO, crossover; CONFIDENCE, Comparison of Glycaemic Control and  $\beta$ -Cell Function Amongst Newly Diagnosed Patients With Type 2 Diabetes Treated With Exenatide, Insulin or Pioglitazone: A Multicentre Randomized Parallel-Group Study; DBP, diastolic blood pressure; DD, double dummy; DULA, dulaglutide; DURATION, Diabetes Therapy Utilization: Researching Changes in A1c, Weight and Other Factors Through Intervention With Exenatide Once Weekly; EUREXA, European Exenatide Study; ExBID, exenatide twice daily; ExQW, exenatide once weekly; GLIM, glimepiride; GLP-1RA, glucagon-like peptide-1 receptor agonist; GLT, glucose-lowering therapy; GLYB, glyburide; HDL, high-density lipoprotein; LDL, low-density lipoprotein; LEAD, Liraglutide Effect and Action in Diabetes; LIRA, liraglutide; LIXI, lixisenatide; MC, multicenter; MET, metformin; NR, not reported; OL, open label; PBO, placebo; PG, parallel group; PIO, pioglitazone; pts, patients; QD, once daily; QW, once weekly; R, randomized; ROSI, rosiglitazone; SB, single blind; SBP, systolic blood pressure; SITA, sitagliptin; T2D, type 2 diabetes; TID, three times a day; TZD, thiazolidinedione; VILD, vildagliptin.

**Supplemental Table S2** Results of retrospective trials of GLP-1RAs and oral glucose-lowering therapies or insulins: blood pressure and lipids

| Publication                                     | Study design<br>[study duration]                                                                           | Treatment<br>[patient<br>number]             | Background<br>therapy | Change from baseline at study end, GLP-1RAs vs comparator |                            |                              |                              |                              |                              |
|-------------------------------------------------|------------------------------------------------------------------------------------------------------------|----------------------------------------------|-----------------------|-----------------------------------------------------------|----------------------------|------------------------------|------------------------------|------------------------------|------------------------------|
|                                                 |                                                                                                            |                                              |                       | Blood pressure<br>(mm Hg)                                 |                            | Lipid parameters (mmol/L)    |                              |                              |                              |
|                                                 |                                                                                                            |                                              |                       | SBP                                                       | DBP                        | Total<br>cholesterol         | LDL<br>cholesterol           | HDL<br>cholesterol           | Triglycerides                |
| <b><i>Dipeptidyl peptidase-4 inhibitors</i></b> |                                                                                                            |                                              |                       |                                                           |                            |                              |                              |                              |                              |
| Horton et al<br>2010 <sup>21</sup>              | Retrospective<br>analysis of adult<br>pts with T2D using<br>data from the GEC<br>database [3–12<br>months] | EXE [6280]<br>INS<br>[32,398]<br>SITA [5861] | OADs                  | EXE: -2.3<br>SITA:<br>-1.1                                | EXE: -1.2<br>SITA:<br>-0.6 | EXE: -0.28<br>SITA:<br>-0.26 | EXE: -0.10<br>SITA:<br>-0.16 | EXE: -0.01<br>SITA:<br>-0.02 | EXE: -0.30<br>SITA:<br>-0.23 |
| Nyeland et al<br>2015 <sup>22</sup>             | Retrospective<br>database analysis<br>of adult pts with<br>T2D in primary<br>care in UK [6<br>months]      | LIRA [287]<br>SITA [2781]                    | OADs                  | LIRA:<br>-3.91<br>SITA:<br>-0.38***                       | NR                         | NR                           | NR                           | NR                           | NR                           |
| <b><i>Insulins</i></b>                          |                                                                                                            |                                              |                       |                                                           |                            |                              |                              |                              |                              |
| Horton et al<br>2010 <sup>21</sup>              | Retrospective<br>analysis of pts with                                                                      | EXE [6280]<br>INS                            | OADs                  | EXE: -2.3<br>INS: -1.8                                    | EXE: -1.2<br>INS: -1.3     | EXE: -0.28<br>INS: -0.36     | EXE: -0.10<br>INS: -0.21     | EXE: -0.01<br>INS: -0.01     | EXE: -0.30<br>INS: -0.51     |

| Publication                                                 | Study design<br>[study duration]                                                                                    | Treatment<br>[patient<br>number] | Background<br>therapy | Change from baseline at study end, GLP-1RAs vs comparator |                              |                                |                                |                                |                                |
|-------------------------------------------------------------|---------------------------------------------------------------------------------------------------------------------|----------------------------------|-----------------------|-----------------------------------------------------------|------------------------------|--------------------------------|--------------------------------|--------------------------------|--------------------------------|
|                                                             |                                                                                                                     |                                  |                       | Blood pressure<br>(mm Hg)                                 |                              | Lipid parameters (mmol/L)      |                                |                                |                                |
|                                                             |                                                                                                                     |                                  |                       | SBP                                                       | DBP                          | Total<br>cholesterol           | LDL<br>cholesterol             | HDL<br>cholesterol             | Triglycerides                  |
|                                                             | T2D using data<br>from the GEC<br>database [3–12<br>months]                                                         | [32,398]<br><br>SITA [5861]      |                       |                                                           |                              |                                |                                |                                |                                |
| Pawaskar et al<br>2012 <sup>23</sup> Diabetes<br>Obes Metab | Retrospective<br>analysis of adult<br>pts with T2D using<br>data from the GEC<br>database [1 year]                  | EXE [4494]<br><br>IG [5424]      | OADs                  | EXE:<br>-1.8**<br><br>IG: -0.1                            | EXE:<br>-0.7<br><br>IG: -0.9 | EXE:<br>-0.20<br><br>IG: -0.21 | EXE:<br>-0.11<br><br>IG: -0.07 | EXE:<br>-0.00<br><br>IG: -0.01 | EXE:<br>-0.19<br><br>IG: -0.24 |
| Pawaskar et al<br>2012 <sup>24</sup> Curr Med<br>Res Opin   | Retrospective<br>analysis of elderly<br>pts (≥65 years)<br>with T2D using<br>data from the GEC<br>database [1 year] | EXE [1023]<br><br>IG [2238]      | OADs                  | EXE:<br>-2.2*<br><br>IG: +1.0                             | EXE:<br>-0.8<br><br>IG: -0.7 | NR                             | NR                             | NR                             | NR                             |
| Sudhakaran et al<br>2010 <sup>25</sup>                      | Retrospective<br>analysis of adult                                                                                  | ExBID 5–10<br>mcg [47]           | OADs                  | EXE: -2<br>IG: +2                                         | EXE: -1<br>IG: -1            | EXE: -0.3<br>IG: -0.3          | EXE: -0.4<br>IG: -0.5          | EXE: -0.1<br>IG: 0.0           | EXE: -0.1<br>IG: -0.1          |

| Publication                          | Study design<br>[study duration]                                               | Treatment<br>[patient<br>number]                     | Background<br>therapy | Change from baseline at study end, GLP-1RAs vs comparator |                |                           |                    |                    |                |
|--------------------------------------|--------------------------------------------------------------------------------|------------------------------------------------------|-----------------------|-----------------------------------------------------------|----------------|---------------------------|--------------------|--------------------|----------------|
|                                      |                                                                                |                                                      |                       | Blood pressure<br>(mm Hg)                                 |                | Lipid parameters (mmol/L) |                    |                    |                |
|                                      |                                                                                |                                                      |                       | SBP                                                       | DBP            | Total<br>cholesterol      | LDL<br>cholesterol | HDL<br>cholesterol | Triglycerides  |
|                                      | pts with T2D in<br>India [24 weeks]                                            | IG QD or<br>NPH QD or<br>BID [54]<br>[23]            |                       | NPH: -4                                                   | NPH: -1        | NPH: -0.1                 | NPH: -0.2          | NPH: -0.1          | NPH: -0.1      |
| <b>Sulfonylureas</b>                 |                                                                                |                                                      |                       |                                                           |                |                           |                    |                    |                |
| Chiefari et al<br>2015 <sup>26</sup> | Retrospective<br>analysis in adult<br>out-pts with T2D in<br>Italy [18 months] | LIRA 1.8<br>mg/day [76]<br>GLIM 4<br>mg/day<br>[103] | MET                   | LIRA:<br>-10.0***                                         | LIRA:<br>0.0** | LIRA:<br>-0.30            | NR                 | LIRA:<br>+0.05     | LIRA:<br>-0.07 |
|                                      |                                                                                |                                                      |                       | GLIM:<br>0.0                                              | GLIM:<br>0.0   | GLIM:<br>-0.16            |                    | GLIM:<br>+0.03     | GLIM:<br>+0.05 |

**Notes:** \* $P < 0.05$ ; \*\* $P < 0.01$ ; \*\*\* $P \leq 0.001$ , GLP-1RA vs comparator.

**Abbreviations:** BID, twice daily; ExBID, exenatide twice daily; EXE, exenatide; GEC, General Electric Centricity; GLP-1RA, glucagon-like peptide-1 receptor agonist; GLIM, glimepiride; IDet, insulin detemir; IG, insulin glargine; INS, insulin; LAI, long-acting insulin; LIRA, liraglutide; OAD, oral antidiabetes drug; NPH, neutral protamine Hagedorn insulin; NR, not reported; pts, patients; QD, once daily; RAI, rapid-acting insulin; SITA, sitagliptin; T2D, type 2 diabetes; VHA, Veterans Health Administration; VILD, vildagliptin.



**Supplemental Table S3** Results of prospective (randomized controlled and noninterventional) trials of GLP-1RAs versus insulins: blood pressure and lipids

| Publication (acronym/<br>ClinicalTrials.gov<br>record)        | Study<br>design<br>[study<br>duration]            | Treatment<br>[patient<br>number]                      | Background<br>therapy | Change from baseline at study end, GLP-1RAs vs insulin |                           |                                         |                    |                                   |                                           |
|---------------------------------------------------------------|---------------------------------------------------|-------------------------------------------------------|-----------------------|--------------------------------------------------------|---------------------------|-----------------------------------------|--------------------|-----------------------------------|-------------------------------------------|
|                                                               |                                                   |                                                       |                       | BP (mm Hg)                                             |                           | Lipid parameters (mmol/L)               |                    |                                   |                                           |
|                                                               |                                                   |                                                       |                       | SBP                                                    | DBP                       | Total<br>cholesterol                    | LDL<br>cholesterol | HDL<br>cholesterol                | Triglycerides                             |
| <b><i>Insulin</i></b>                                         |                                                   |                                                       |                       |                                                        |                           |                                         |                    |                                   |                                           |
| Östenson et al 2013 <sup>27</sup><br>(CHOICE;<br>NCT00635492) | MC, O study<br>in pts with                        | ExBID<br>[1096]                                       | OADs                  | ExBID:<br>-2.4                                         | ExBID:<br>-1.6            | ExBID:<br>-0.2                          | ExBID:<br>-0.1     | ExBID:<br>0.0                     | ExBID:<br>-0.3                            |
|                                                               | T2D [12<br>months]                                | INS [1239]                                            |                       | INS:<br>-2.5                                           | INS:<br>-1.8              | INS:<br>-0.3                            | INS:<br>-0.2       | INS:<br>+0.1                      | INS:<br>-0.4                              |
| Mathieu et al 2013 <sup>28</sup><br>(CHOICE;<br>NCT00635492)  | MC, O study<br>in pts with                        | ExBID<br>[1114]                                       | OADs                  | ExBID:<br>-3.1                                         | ExBID:<br>-3.2            | ExBID:<br>-0.3                          | ExBID:<br>-0.2     | ExBID:<br>0.0                     | ExBID:<br>-0.4                            |
|                                                               | T2D [24<br>months]                                | INS [1274]                                            |                       | INS:<br>-3.5                                           | INS:<br>-2.0              | INS:<br>-0.4                            | INS:<br>-0.3       | INS:<br>+0.1                      | INS:<br>-0.4                              |
| <b><i>Insulin aspart</i></b>                                  |                                                   |                                                       |                       |                                                        |                           |                                         |                    |                                   |                                           |
| Nauck et al 2007 <sup>29</sup><br>(NCT00082407)               | MC, OL, PG,<br>R in pts with<br>T2D [52<br>weeks] | ExBID 5–<br>10 mcg<br>[253]<br>Biphasic<br>IAsp [248] | SU                    | ExBID:<br>-5†††<br>IAsp: +1                            | ExBID:<br>-2†<br>IAsp: +1 | No significant changes<br>from baseline |                    | Treatment<br>difference<br>-0.04* | No significant<br>change from<br>baseline |

| Publication (acronym/<br>ClinicalTrials.gov<br>record)                         | Study<br>design<br>[study<br>duration]                              | Treatment<br>[patient<br>number]                                             | Background<br>therapy | Change from baseline at study end, GLP-1RAs vs insulin    |                                |                                                                                                  |                                 |                                  |                                 |
|--------------------------------------------------------------------------------|---------------------------------------------------------------------|------------------------------------------------------------------------------|-----------------------|-----------------------------------------------------------|--------------------------------|--------------------------------------------------------------------------------------------------|---------------------------------|----------------------------------|---------------------------------|
|                                                                                |                                                                     |                                                                              |                       | BP (mm Hg)                                                |                                | Lipid parameters (mmol/L)                                                                        |                                 |                                  |                                 |
|                                                                                |                                                                     |                                                                              |                       | SBP                                                       | DBP                            | Total<br>cholesterol                                                                             | LDL<br>cholesterol              | HDL<br>cholesterol               | Triglycerides                   |
| Mathieu et al 2014 <sup>30</sup><br>(BEGIN: VICTOZA<br>ADD-ON;<br>NCT01388361) | MC, OL, PG,<br>R in insulin-<br>naive pts with<br>T2D [26<br>weeks] | LIRA 0.6–<br>1.8 mg/day<br>[88]<br>IAsp [89] <sup>a</sup>                    | IDeg<br>MET           | NR                                                        | NR                             | No clinically relevant differences from baseline to end of trial or<br>between groups in lipids. |                                 |                                  |                                 |
| <b><i>Insulin degludec</i></b>                                                 |                                                                     |                                                                              |                       |                                                           |                                |                                                                                                  |                                 |                                  |                                 |
| Gough et al 2015 <sup>31</sup><br>(DUAL-1;<br>NCT01336023)                     | Extension of<br>DUAL I in pts<br>with T2D [52<br>weeks]             | IDeg/LIRA<br>QD [665]<br>LIRA 0.6–<br>1.8 mg QD<br>[313]<br>IDeg QD<br>[333] | MET<br>PIO            | No significant<br>differences between<br>IDeg QD and LIRA |                                | NR                                                                                               | NR                              | NR                               | NR                              |
| <b><i>Insulin detemir</i></b>                                                  |                                                                     |                                                                              |                       |                                                           |                                |                                                                                                  |                                 |                                  |                                 |
| Davies et al 2013 <sup>32</sup><br>(NCT01003184)                               | MC, OL, PG,<br>R in pts with<br>T2D [26<br>weeks]                   | ExQW 2<br>mg [111]<br>IDet QD or<br>BID [105]                                | MET<br>± SU           | ExQW:<br>–6.8<br>IDet:<br>–2.4                            | ExQW:<br>–0.4<br>IDet:<br>–0.3 | ExQW:<br>–0.1<br>IDet:<br>+0.1                                                                   | ExQW:<br>–0.1<br>IDet:<br>+0.03 | ExQW:<br>+0.02<br>IDet:<br>+0.04 | ExQW:<br>–0.01<br>IDet:<br>–0.1 |

| Publication (acronym/<br>ClinicalTrials.gov<br>record)                        | Study<br>design<br>[study<br>duration]                               | Treatment<br>[patient<br>number]        | Background<br>therapy | Change from baseline at study end, GLP-1RAs vs insulin |                                                     |                                                       |                                |                              |                                                                   |
|-------------------------------------------------------------------------------|----------------------------------------------------------------------|-----------------------------------------|-----------------------|--------------------------------------------------------|-----------------------------------------------------|-------------------------------------------------------|--------------------------------|------------------------------|-------------------------------------------------------------------|
|                                                                               |                                                                      |                                         |                       | BP (mm Hg)                                             |                                                     | Lipid parameters (mmol/L)                             |                                |                              |                                                                   |
|                                                                               |                                                                      |                                         |                       | SBP                                                    | DBP                                                 | Total<br>cholesterol                                  | LDL<br>cholesterol             | HDL<br>cholesterol           | Triglycerides                                                     |
| <b><i>Insulin glargine</i></b>                                                |                                                                      |                                         |                       |                                                        |                                                     |                                                       |                                |                              |                                                                   |
| Davies et al 2009 <sup>33</sup><br>(HEELA)                                    | MC, OL, PG,<br>R in pts with<br>T2D [26<br>weeks]                    | ExBID 5–<br>10 mcg<br>[118]<br>IG [117] | MET<br>SU<br>TZD      | ExBID:<br>–2.9†<br>IG: +0.7                            | ExBID:<br>–0.5<br>IG: +0.9                          | ExBID:<br>–0.36†††<br>IG: –0.21††                     | ExBID:<br>–0.25††<br>IG: –0.07 | ExBID:<br>+0.01<br>IG: +0.02 | ExBID:<br>–0.33†††<br>IG: –0.38†††                                |
| Diamant et al 2010 <sup>34</sup><br>(DURATION-3;<br>NCT00641056)              | MC, OL, PG,<br>R in pts with<br>T2D [26<br>weeks]                    | ExQW 2<br>mg [233]<br>IG QD<br>[223]    | MET<br>± SU           | ExQW:<br>–3†<br>IG: –1                                 | ExQW:<br>–1<br>IG: –1                               | ExQW:<br>–0.12†<br>IG: –0.04                          | ExQW:<br>–0.05<br>IG: +0.04    | ExQW:<br>0.00<br>IG: +0.01   | NR<br>(ratio of week<br>26 to baseline<br>ExQW: 0.96<br>IG: 0.89) |
| Diamant et al 2012 <sup>35</sup><br>(DURATION-3<br>extension;<br>NCT00641056) | OL extension<br>of<br>DURATION-3<br>in pts with<br>T2D [84<br>weeks] | ExQW 2<br>mg [233]<br>IG QD<br>[234]    | MET<br>± SU           | ExQW:<br>–4.2 <sup>b</sup><br>IG: –0.8                 | ExQW:<br>–1.5 <sup>b</sup><br>IG: –1.4 <sup>b</sup> | ExQW:<br>–0.12 <sup>b</sup><br>IG: –0.19 <sup>c</sup> | NR                             | NR                           | ExQW:<br>+0.95<br>IG: +0.89 <sup>b</sup>                          |
| Diamant et al 2014 <sup>36</sup><br>(DURATION-3)                              | OL extension<br>of                                                   | ExQW 2<br>mg [194]                      | MET<br>± SU           | ExQW:<br>–2                                            | ExQW:<br>–2                                         | ExQW:<br>–0.13                                        | ExQW:<br>–0.17†††              | ExQW:<br>+0.05††             | ExQW:<br>+1.02                                                    |

| Publication (acronym/<br>ClinicalTrials.gov<br>record)       | Study<br>design<br>[study<br>duration]                        | Treatment<br>[patient<br>number]              | Background<br>therapy | Change from baseline at study end, GLP-1RAs vs insulin |                                   |                                 |                                 |                                    |                                 |
|--------------------------------------------------------------|---------------------------------------------------------------|-----------------------------------------------|-----------------------|--------------------------------------------------------|-----------------------------------|---------------------------------|---------------------------------|------------------------------------|---------------------------------|
|                                                              |                                                               |                                               |                       | BP (mm Hg)                                             |                                   | Lipid parameters (mmol/L)       |                                 |                                    |                                 |
|                                                              |                                                               |                                               |                       | SBP                                                    | DBP                               | Total<br>cholesterol            | LDL<br>cholesterol              | HDL<br>cholesterol                 | Triglycerides                   |
| extension;<br>NCT00641056)                                   | DURATION-3<br>in pts with<br>T2D [156<br>weeks]               | IG QD<br>[196]                                |                       | IG: +2                                                 | IG: -2                            | IG: -0.07                       | IG: -0.13†                      | IG: +0.05††                        | IG: +0.97                       |
| Inagaki et al 2012 <sup>37</sup><br>(NCT00935532)            | MC, OL, PG,<br>R in<br>Japanese pts<br>with T2D [26<br>weeks] | ExQW 2<br>mg [215]<br>IG [212]                | BG<br>± TZD           | NR                                                     | NR                                | ExQW:<br>-0.37***<br>IG: -0.16  | ExQW:<br>-0.33***<br>IG: -0.15  | ExQW:<br>-0.03<br>IG: -0.02        | ExQW:<br>+0.01<br>IG: +0.01     |
| Araki et al 2015 <sup>38</sup><br>(NCT01584232)              | MC, OL, PG,<br>R in<br>Japanese pts<br>with T2D [26<br>weeks] | DULA 0.75<br>mg QW<br>[181]<br>IG QD<br>[180] | BG<br>± SU            | DULA<br>0.75:<br>+0.4<br>IG: +2.7                      | DULA<br>0.75:<br>+0.3<br>IG: +0.3 | NR                              | NR                              | NR                                 | NR                              |
| Blonde et al 2015 <sup>39</sup><br>(AWARD-4;<br>NCT01191268) | MC, OL, PG,<br>R in pts with<br>T2D [52<br>weeks]             | DULA 0.75<br>mg QW<br>[293]<br>DULA 1.5       | ILis<br>MET           | DULA<br>0.75:<br>+1.04<br>DULA                         | DULA<br>0.75:<br>+0.15<br>DULA    | DULA<br>0.75:<br>+0.94%<br>DULA | DULA<br>0.75:<br>-1.02%<br>DULA | DULA<br>0.75:<br>+3.54%***<br>DULA | DULA<br>0.75:<br>+5.73%<br>DULA |

| Publication (acronym/<br>ClinicalTrials.gov<br>record)         | Study<br>design<br>[study<br>duration]            | Treatment<br>[patient<br>number]                                            | Background<br>therapy | Change from baseline at study end, GLP-1RAs vs insulin          |                                                                 |                                                                 |                                                             |                                                             |                                                             |
|----------------------------------------------------------------|---------------------------------------------------|-----------------------------------------------------------------------------|-----------------------|-----------------------------------------------------------------|-----------------------------------------------------------------|-----------------------------------------------------------------|-------------------------------------------------------------|-------------------------------------------------------------|-------------------------------------------------------------|
|                                                                |                                                   |                                                                             |                       | BP (mm Hg)                                                      |                                                                 | Lipid parameters (mmol/L)                                       |                                                             |                                                             |                                                             |
|                                                                |                                                   |                                                                             |                       | SBP                                                             | DBP                                                             | Total<br>cholesterol                                            | LDL<br>cholesterol                                          | HDL<br>cholesterol                                          | Triglycerides                                               |
|                                                                |                                                   | mg QW<br>[295]                                                              |                       | 1.5:<br>-0.26                                                   | 1.5:<br>-0.01                                                   | 1.5:<br>0%                                                      | 1.5:<br>-1.95%                                              | 1.5:<br>+2.44%***                                           | 1.5:<br>2.96%                                               |
|                                                                |                                                   | IG QD<br>[296]                                                              |                       | IG:<br>+1.98                                                    | IG:<br>-0.34                                                    | IG:<br>+1.80%                                                   | IG:<br>+1.79%                                               | IG:<br>-2.56%                                               | IG:<br>+3.70%                                               |
| D'Alessio et al 2015 <sup>40</sup><br>(EAGLE)                  | MC, OL, PG,<br>R in pts with<br>T2D [24<br>weeks] | LIRA 0.6–<br>1.8 mg QD<br>[489]<br>IG QD<br>[489]                           | MET<br>± SU           | LIRA:<br>-3.1***<br>IG: -0.1                                    | LIRA:<br>-0.9<br>IG: -0.3                                       | LIRA:<br>-0.3<br>IG: -0.2                                       | LIRA:<br>-0.2*<br>IG: -0.0                                  | LIRA:<br>-0.0***<br>IG: +0.0                                | LIRA:<br>-0.3**<br>IG: -0.5                                 |
| Giorgino et al 2015 <sup>41</sup><br>(AWARD-2;<br>NCT01075282) | MC, OL, PG,<br>R in pts with<br>T2D [78<br>weeks] | DULA 0.75<br>mg QW<br>[272]<br>DULA 1.5<br>mg QW<br>[273]<br>IG QD<br>[262] | MET<br>GLIM           | DULA<br>0.75:<br>-0.59<br>DULA<br>1.5:<br>-0.70<br>IG:<br>+0.51 | DULA<br>0.75:<br>-0.36<br>DULA<br>1.5:<br>-0.44<br>IG:<br>-1.04 | DULA<br>0.75:<br>+0.03<br>DULA<br>1.5:<br>+0.02<br>IG:<br>+0.02 | DULA<br>0.75:<br>-0.02<br>DULA<br>1.5:<br>0<br>IG:<br>+0.03 | DULA<br>0.75:<br>-0.02<br>DULA<br>1.5:<br>0<br>IG:<br>-0.04 | DULA<br>0.75:<br>+0.03<br>DULA<br>1.5:<br>+0.05<br>IG:<br>0 |

| Publication (acronym/<br>ClinicalTrials.gov<br>record)             | Study<br>design<br>[study<br>duration]                                    | Treatment<br>[patient<br>number]                           | Background<br>therapy | Change from baseline at study end, GLP-1RAs vs insulin |                                                              |                               |                                |                                 |                                |
|--------------------------------------------------------------------|---------------------------------------------------------------------------|------------------------------------------------------------|-----------------------|--------------------------------------------------------|--------------------------------------------------------------|-------------------------------|--------------------------------|---------------------------------|--------------------------------|
|                                                                    |                                                                           |                                                            |                       | BP (mm Hg)                                             |                                                              | Lipid parameters (mmol/L)     |                                |                                 |                                |
|                                                                    |                                                                           |                                                            |                       | SBP                                                    | DBP                                                          | Total<br>cholesterol          | LDL<br>cholesterol             | HDL<br>cholesterol              | Triglycerides                  |
| Russell-Jones et al<br>2009 <sup>42</sup> (LEAD-5;<br>NCT00331851) | MC, OL, PG,<br>R in pts with<br>T2D [26<br>weeks]                         | LIRA 1.8<br>mg QD<br>[230]<br>IG QD<br>[232]<br>PBO [114]  | MET<br>GLIM           | LIRA:<br>-4.0***<br>IG:<br>+0.54                       | No<br>significant<br>difference<br>between<br>LIRA and<br>IG | NR                            | NR                             | NR                              | NR                             |
| <b><i>Insulin lispro</i></b>                                       |                                                                           |                                                            |                       |                                                        |                                                              |                               |                                |                                 |                                |
| Diamant et al 2014 <sup>43</sup><br>(NCT00960661)                  | MC, OL, PG,<br>R in pts with<br>T2D [30<br>weeks]                         | ExBID 5-<br>10 mcg<br>[315]<br>ILis TID<br>[312]           | MET<br>IG             | ExBID:<br>-4.1<br>ILis: +0.4                           | ExBID:<br>-0.6<br>ILis: -0.1                                 | ExBID:<br>-0.1<br>ILis: -0.0  | ExBID:<br>-0.1<br>ILis: -0.0   | ExBID:<br>-0.04<br>ILis: +0.03  | ExBID:<br>+0.06<br>ILis: -0.05 |
| Xu et al 2015 <sup>19</sup><br>(CONFIDENCE;<br>NCT01147627)        | MC, OL, PG,<br>R in<br>treatment-<br>naive pts with<br>newly<br>diagnosed | ExBID 5-<br>10 mcg<br>[142]<br>PIO 30-45<br>mg QD<br>[136] | None                  | ExBID:<br>-4†<br>ILis: 0                               | ExBID:<br>-3†<br>ILis: -1                                    | ExBID:<br>-0.2†<br>ILis: -0.1 | ExBID:<br>-0.2†<br>ILis: -0.2§ | ExBID:<br>+0.08†<br>ILis: +0.16 | ExBID:<br>-0.2†<br>ILis: +0.4  |

| Publication (acronym/<br>ClinicalTrials.gov<br>record) | Study<br>design<br>[study<br>duration] | Treatment<br>[patient<br>number] | Background<br>therapy | Change from baseline at study end, GLP-1RAs vs insulin |     |                           |                    |                    |               |
|--------------------------------------------------------|----------------------------------------|----------------------------------|-----------------------|--------------------------------------------------------|-----|---------------------------|--------------------|--------------------|---------------|
|                                                        |                                        |                                  |                       | BP (mm Hg)                                             |     | Lipid parameters (mmol/L) |                    |                    |               |
|                                                        |                                        |                                  |                       | SBP                                                    | DBP | Total<br>cholesterol      | LDL<br>cholesterol | HDL<br>cholesterol | Triglycerides |
|                                                        | T2D [48<br>weeks]                      | ILis BID<br>[138]                |                       |                                                        |     |                           |                    |                    |               |

**Notes:** <sup>a</sup>Treatment arms were also compared with a nonrandomized group of patients who received IDeg alone (n = 236); <sup>b</sup> Significantly different from baseline; *P* value not reported. \**P* < 0.05; \*\**P* < 0.01; \*\*\**P* ≤ 0.001, GLP-1RA vs INS comparator; †*P* < 0.05, ††*P* < 0.01, †††*P* ≤ 0.001 vs baseline.

**Abbreviations:** AWARD, Assessment of Weekly Administration of Dulaglutide in Diabetes; BG, biguanide; BID, twice daily; CHOICE, Changes to Treatment and Outcomes in Patients With Type 2 Diabetes Initiating Injectible Therapy; CO, crossover; CONFIDENCE, Comparison of Glycaemic Control and β-Cell Function Amongst Newly Diagnosed Patients With Type 2 Diabetes Treated With Exenatide, Insulin or Pioglitazone: A Multicentre Randomized Parallel-Group Study; DBP, diastolic blood pressure; DD, double dummy; DUAL, Dual Action of Liraglutide and Insulin Degludec in Type 2 Diabetes; DULA, dulaglutide; DURATION, Diabetes Therapy Utilization: Researching Changes in A1c, Weight and Other Factors Through Intervention With Exenatide Once Weekly; EAGLE, Efficacy Assessment of Insulin Glargine vs Liraglutide After Oral Agent Failure; ExBID, exenatide twice daily; ExQW, exenatide once weekly; GLIM, glimepiride; GLP-1RA, glucagon-like peptide-1 receptor agonist; HEELA, Helping Evaluate Exenatide in Patients With Diabetes Compared With Long-Acting Insulin; IAsp, insulin aspart; IDeg, insulin degludec; IDet, insulin detemir; IG, insulin glargine; ILis, insulin lispro; INS, insulin; LEAD, Liraglutide Effect and Action in Diabetes; LIRA, liraglutide; MC, multicenter; MET, metformin; NR, not reported; OAD, oral antidiabetes drug; O, observational; OL, open label; PG, parallel group; PIO, pioglitazone; pts, patients; QD, once daily; QW, once weekly; R, randomized; SITA, sitagliptin; SU, sulfonylurea; T2D, type 2 diabetes; TID, three times daily; TZD, thiazolidinedione.

## References

1. Berg JK, Shenouda SK, Heilmann CR, Gray AL, Holcombe JH. Effects of exenatide twice daily versus sitagliptin on 24-h glucose, glucoregulatory and hormonal measures: a randomized, double-blind, crossover study. *Diabetes Obes Metab.* 2011;13(11):982–989.
2. Bergenstal RM, Wysham C, Macconell L, et al. Efficacy and safety of exenatide once weekly versus sitagliptin or pioglitazone as an adjunct to metformin for treatment of type 2 diabetes (DURATION-2): a randomised trial. *Lancet.* 2010;376(9739):431–439.
3. Russell-Jones D, Cuddihy RM, Hanefeld M, et al. Efficacy and safety of exenatide once weekly versus metformin, pioglitazone, and sitagliptin used as monotherapy in drug-naive patients with type 2 diabetes (DURATION-4): a 26-week double-blind study. *Diabetes Care.* 2012;35(2):252–258.
4. Nauck M, Weinstock RS, Umpierrez GE, Guerci B, Skrivanek Z, Milicevic Z. Efficacy and safety of dulaglutide versus sitagliptin after 52 weeks in type 2 diabetes in a randomized controlled trial (AWARD-5). *Diabetes Care.* 2014;37(8):2149–2158.
5. Weinstock RS, Guerci B, Umpierrez G, Nauck MA, Skrivanek Z, Milicevic Z. Safety and efficacy of once-weekly dulaglutide versus sitagliptin after 2 years in metformin-treated patients with type 2 diabetes (AWARD-5): a randomized, phase III study. *Diabetes Obes Metab.* 2015;17(9):849–858.
6. Charbonnel B, Steinberg H, Eymard E, et al. Efficacy and safety over 26 weeks of an oral treatment strategy including sitagliptin compared with an injectable treatment strategy with liraglutide in patients with type 2 diabetes mellitus inadequately controlled on metformin: a randomised clinical trial. *Diabetologia.* 2013;56(7):1503–1511.
7. Pratley R, Nauck M, Bailey T, et al. One year of liraglutide treatment offers sustained and more effective glycaemic control and weight reduction compared with sitagliptin, both in combination with metformin, in patients with type 2 diabetes: a randomised, parallel-group, open-label trial. *Int J Clin Pract.* 2011;65(4):397–407.
8. Pratley RE, Nauck MA, Bailey T, et al. Efficacy and safety of switching from the DPP-4 inhibitor sitagliptin to the human GLP-1 analog liraglutide after 52 weeks in metformin-treated patients with type 2 diabetes: a randomized, open-label trial. *Diabetes Care.* 2012;35(10):1986–1993.



9. Takeshita Y, Takamura T, Kita Y, et al. Vildagliptin vs liraglutide as a second-line therapy switched from sitagliptin-based regimens in patients with type 2 diabetes: a randomized, parallel-group study. *J Diabetes Investig.* 2015;6(2):192–200.
10. Umpierrez G, Tofé Povedano S, Pérez Manghi F, Shurzinske L, Pechtner V. Efficacy and safety of dulaglutide monotherapy versus metformin in type 2 diabetes in a randomized controlled trial (AWARD-3). *Diabetes Care.* 2014;37(8):2168–2176.
11. Gallwitz B, Guzman J, Dotta F, et al. Exenatide twice daily versus glimepiride for prevention of glycaemic deterioration in patients with type 2 diabetes with metformin failure (EUREXA): an open-label, randomised controlled trial. *Lancet.* 2012;379(9833):2270–2278.
12. Nauck M, Frid A, Hermansen K, et al. Efficacy and safety comparison of liraglutide, glimepiride, and placebo, all in combination with metformin, in type 2 diabetes: the LEAD (liraglutide effect and action in diabetes)-2 study. *Diabetes Care.* 2009;32(1):84–90.
13. Nauck M, Frid A, Hermansen K, et al. Long-term efficacy and safety comparison of liraglutide, glimepiride and placebo, all in combination with metformin in type 2 diabetes: 2-year results from the LEAD-2 study. *Diabetes Obes Metab.* 2013;15(3):204–212.
14. Garber A, Henry R, Ratner R, et al. Liraglutide versus glimepiride monotherapy for type 2 diabetes (LEAD-3 Mono): a randomised, 52-week, phase III, double-blind, parallel-treatment trial. *Lancet.* 2009;373(9662):473–481.
15. Garber A, Henry RR, Ratner R, et al. Liraglutide, a once-daily human glucagon-like peptide 1 analogue, provides sustained improvements in glycaemic control and weight for 2 years as monotherapy compared with glimepiride in patients with type 2 diabetes. *Diabetes Obes Metab.* 2011;13(4):348–356.
16. Seino Y, Rasmussen MF, Nishida T, Kaku K. Efficacy and safety of the once-daily human GLP-1 analogue, liraglutide, vs glibenclamide monotherapy in Japanese patients with type 2 diabetes. *Curr Med Res Opin.* 2010;26(5):1013–1022.
17. Kaku K, Rasmussen MF, Nishida T, Seino Y. Fifty-two-week, randomized, multicenter trial to compare the safety and efficacy of the novel glucagon-like peptide-1 analog liraglutide vs glibenclamide in patients with type 2 diabetes. *J Diabetes Investig.* 2011;2(6):441–447.

18. DeFronzo RA, Triplitt C, Qu Y, Lewis MS, Maggs D, Glass LC. Effects of exenatide plus rosiglitazone on  $\beta$ -cell function and insulin sensitivity in subjects with type 2 diabetes on metformin. *Diabetes Care*. 2010;33(5):951–957.
19. Xu W, Bi Y, Sun Z, et al. Comparison of the effects on glycaemic control and beta-cell function in newly diagnosed type 2 diabetes patients of treatment with exenatide, insulin or pioglitazone: a multicentre randomized parallel-group trial (the CONFIDENCE study). *J Intern Med*. 2015;277(1):137–150.
20. Marre M, Shaw J, Brandle M, et al. Liraglutide, a once-daily human GLP-1 analogue, added to a sulphonylurea over 26 weeks produces greater improvements in glycaemic and weight control compared with adding rosiglitazone or placebo in subjects with type 2 diabetes (LEAD-1 SU). *Diabet Med*. 2009;26(3):268–278.
21. Horton ES, Silberman C, Davis KL, Berria R. Weight loss, glycemic control, and changes in cardiovascular biomarkers in patients with type 2 diabetes receiving incretin therapies or insulin in a large cohort database. *Diabetes Care*. 2010;33(8):1759–1765.
22. Nyeland ME, Ploug UJ, Richards A, et al. Evaluation of the effectiveness of liraglutide and sitagliptin in type 2 diabetes: a retrospective study in UK primary care. *Int J Clin Pract*. 2015;69(3):281–291.
23. Pawaskar M, Li Q, Hoogwerf BJ, et al. Metabolic outcomes of matched patient populations initiating exenatide BID vs. insulin glargine in an ambulatory care setting. *Diabetes Obes Metab*. 2012;14(7):626–633.
24. Pawaskar M, Li Q, Reynolds MW. Metabolic outcomes of elderly patient populations initiating exenatide BID versus insulin glargine in an ambulatory care setting. *Curr Med Res Opin*. 2012;28(6):991–997.
25. Sudhakaran C, Fathima M, Anjana RM, Unnikrishnan RI, Mohan V. Effectiveness of exenatide in Asian Indians in a clinical care setting. *Diabetes Technol Ther*. 2010;12(8):613–618.
26. Chiefari E, Capula C, Vero A, et al. Add-on treatment with liraglutide improves glycemic control in patients with type 2 diabetes on metformin therapy. *Diabetes Technol Ther*. 2015;17(7):468–474.

27. Östenson C-G, Matthaei S, Reaney M, et al. Treatment outcomes after initiation of exenatide twice daily or insulin in clinical practice: 12-month results from CHOICE in six European countries. *Diabetes Metab Syndr Obes*. 2013;6:171–185.
28. Mathieu C, Östenson C-G, Matthaei S, et al. Using exenatide twice daily or insulin in clinical practice: results from CHOICE. *Diabetes Ther*. 2013;4(2):285–308.
29. Nauck MA, Duran S, Kim D, et al. A comparison of twice-daily exenatide and biphasic insulin aspart in patients with type 2 diabetes who were suboptimally controlled with sulfonylurea and metformin: a non-inferiority study. *Diabetologia*. 2007;50(2):259–267.
30. Mathieu C, Rodbard HW, Cariou B, et al. A comparison of adding liraglutide versus a single daily dose of insulin aspart to insulin degludec in subjects with type 2 diabetes (BEGIN: VICTOZA ADD-ON). *Diabetes Obes Metab*. 2014;16(7):636–644.
31. Gough SC, Bode BW, Woo VC, et al. One-year efficacy and safety of a fixed combination of insulin degludec and liraglutide in patients with type 2 diabetes: results of a 26-week extension to a 26-week main trial. *Diabetes Obes Metab*. 2015;17(10):965–973.
32. Davies M, Heller S, Sreenan S, et al. Once-weekly exenatide versus once- or twice-daily insulin detemir: randomized, open-label, clinical trial of efficacy and safety in patients with type 2 diabetes treated with metformin alone or in combination with sulfonylureas. *Diabetes Care*. 2013;36(5):1368–1376.
33. Davies MJ, Donnelly R, Barnett AH, Jones S, Nicolay C, Kilcoyne A. Exenatide compared with long-acting insulin to achieve glycaemic control with minimal weight gain in patients with type 2 diabetes: results of the Helping Evaluate Exenatide in patients with diabetes compared with Long-Acting insulin (HEELA) study. *Diabetes Obes Metab*. 2009;11(12):1153–1162.
34. Diamant M, Van Gaal L, Stranks S, et al. Once weekly exenatide compared with insulin glargine titrated to target in patients with type 2 diabetes (DURATION-3): an open-label randomised trial. *Lancet*. 2010;375(9733):2234–2243.
35. Diamant M, Van Gaal L, Stranks S, et al. Safety and efficacy of once-weekly exenatide compared with insulin glargine titrated to target in patients with type 2 diabetes over 84 weeks. *Diabetes Care*. 2012;35(4):683–689.

36. Diamant M, Van Gaal L, Guerci B, et al. Exenatide once weekly versus insulin glargine for type 2 diabetes (DURATION-3): 3-year results of an open-label randomised trial. *Lancet Diabetes Endocrinol.* 2014;2(6):464–473.
37. Inagaki N, Atsumi Y, Oura T, Saito H, Imaoka T. Efficacy and safety profile of exenatide once weekly compared with insulin once daily in Japanese patients with type 2 diabetes treated with oral antidiabetes drug(s): results from a 26-week, randomized, open-label, parallel-group, multicenter, noninferiority study. *Clin Ther.* 2012;34(9):1892–1908.
38. Araki E, Inagaki N, Tanizawa Y, Oura T, Takeuchi M, Imaoka T. Efficacy and safety of once-weekly dulaglutide in combination with sulphonylurea and/or biguanide compared with once-daily insulin glargine in Japanese patients with type 2 diabetes: a randomized, open-label, phase III, non-inferiority study. *Diabetes Obes Metab.* 2015;17(10):994–1002.
39. Blonde L, Jendle J, Gross J, et al. Once-weekly dulaglutide versus bedtime insulin glargine, both in combination with prandial insulin lispro, in patients with type 2 diabetes (AWARD-4): a randomised, open-label, phase 3, non-inferiority study. *Lancet.* 2015;385(9982):2057–2066.
40. D'Alessio D, Häring HU, Charbonnel B, et al. Comparison of insulin glargine and liraglutide added to oral agents in patients with poorly controlled type 2 diabetes. *Diabetes Obes Metab.* 2015;17(2):170–178.
41. Giorgino F, Benroubi M, Sun JH, Zimmermann AG, Pechtner V. Efficacy and safety of once-weekly dulaglutide versus insulin glargine in patients with type 2 diabetes on metformin and glimepiride (AWARD-2). *Diabetes Care.* 2015;38(12):2241–2249.
42. Russell-Jones D, Vaag A, Schmitz O, et al. Liraglutide vs insulin glargine and placebo in combination with metformin and sulphonylurea therapy in type 2 diabetes mellitus (LEAD-5 met+SU): a randomised controlled trial. *Diabetologia.* 2009;52(10):2046–2055.
43. Diamant M, Nauck MA, Shaginian R, et al. Glucagon-like peptide 1 receptor agonist or bolus insulin with optimized basal insulin in type 2 diabetes. *Diabetes Care.* 2014;37(10):2763–2773.
